# Supplementary material
Source: publisher figshare collection journal article supplement (https://acs.figshare.com/ndownloader/files/12303380)
Supplement: Supplementary file 2 [file 12303380]

# **Supporting information for: Porous Graphene-Fullerene Nanocomposites: A New Composite for Solar Cell and Optoelectronic Applications**

Chandrima Chakravarty, Bikash Mandal, and Pranab Sarkar\*

*Department of Chemistry, Visva-Bharati University, Santiniketan- 731235, India*

E-mail: pranab.sarkar@visva-bharati.ac.in

## **1 Supporting Information**

1. Explanation of different optical parameters.
2. The total density of states of a representative isolated PG and the projected density of states of PG in its corresponding PG-C<sub>60</sub> composite.

---

\*To whom correspondence should be addressed

The complex dielectric function  $\varepsilon = \varepsilon_1(\omega) + i\varepsilon_2(\omega)$  is used to calculate the optical properties of a system, where  $\varepsilon_1(\omega)$  and  $\varepsilon_2(\omega)$  represent the real and imaginary part of the dielectric function, respectively. The imaginary part which mainly originates from the interband transition, can be obtained from the Fermi's golden rule as

$$\varepsilon_2(\omega) = \frac{4\pi^2}{\Omega\omega^2} \sum_{i \in VB, j \in CB} \sum_k W_k |\rho_{ij}^a|^2 \delta(\varepsilon_{kj} - \varepsilon_{ki} - \omega) \quad (1)$$

where  $\Omega$  is the unit cell volume and  $\omega$  represents the frequency of the electromagnetic radiation, in terms of unit of energy.  $\rho_{ij}$  is the dipole transition matrix element that can be expressed as  $\langle k_j | \hat{p}_\alpha | k_i \rangle$  and can be obtained from self-consistent band structure. The real part of the dielectric function can be obtained by Kramers-Kronig transformation as

$$\varepsilon_1(\omega) = 1 + \frac{4}{\pi} P \int_0^\infty d\omega' \frac{\omega' \varepsilon_2(\omega')}{\omega'^2 - \omega^2} \quad (2)$$

The imaginary and real part of dielectric function can be calculated and using these set of data, other optical properties such as absorption coefficient  $\alpha(\omega)$ , optical conductivity  $\sigma(\omega)$ , reflectivity  $R(\omega)$  and refractive index  $\eta(\omega)$  can be obtained. The absorption coefficient is the fraction of energy lost by the wave when the electromagnetic wave passes through a unit thickness of the materials.

$$\alpha(\omega) = \sqrt{2}\omega \left[ \sqrt{\varepsilon_1^2(\omega) + \varepsilon_2^2(\omega)} - \varepsilon_1(\omega) \right]^{\frac{1}{2}} \quad (3)$$

$$\sigma(\omega) = -i \frac{\omega}{4\pi} [\varepsilon(\omega) - 1] \quad (4)$$

$$R(\omega) = \left[ \frac{\sqrt{\varepsilon_1(\omega) + i\varepsilon_2(\omega)} - 1}{\sqrt{\varepsilon_1(\omega) + i\varepsilon_2(\omega)} + 1} \right]^2 \quad (5)$$

$$\eta(\omega) = \frac{\left[ \sqrt{\varepsilon_1^2(\omega) + \varepsilon_2^2(\omega)} + \varepsilon_1(\omega) \right]^2}{\sqrt{2}} \quad (6)$$

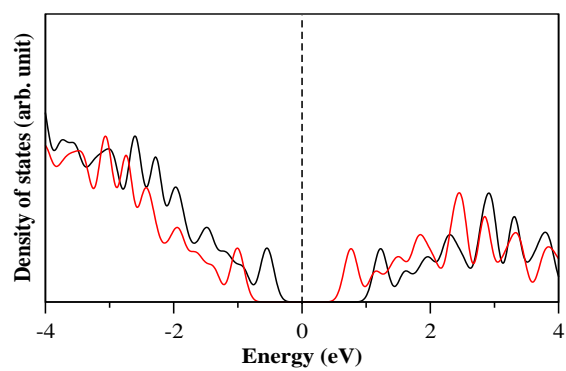

Figure S1: The total density of states of a representative isolated PG (black line) and the projected density of states (red line) of PG in PG-C<sub>60</sub> composite.
