# Supplementary material
Source: publisher figshare collection journal article supplement (https://acs.figshare.com/ndownloader/files/12303380)

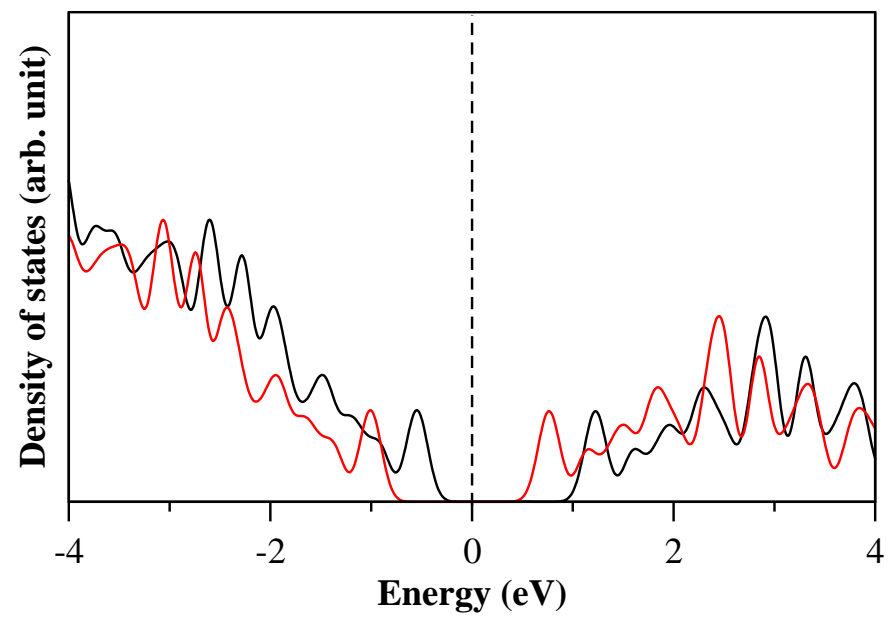

Supplement: Supplementary file 1 [file 12303380]
